# Supplementary material for: 1H–31P HETCOR NMR elucidates the nature of acid sites in zeolite HZSM-5 probed with trimethylphosphine oxide
Source: Royal Society of Chemistry journal article supplement (doi:10.1039/c9cc06763a), 2019-01-01
Supplement: c9cc06763a1.pdf [file c9cc06763a1.pdf]

## **$^1\text{H}$ - $^{31}\text{P}$ HETCOR NMR elucidates the nature of acid sites in zeolite HZSM-5 probed with trimethylphosphine oxide**

Carlos Bornes,<sup>a</sup> Mariana Sardo,<sup>a</sup> Zhi Lin,<sup>a</sup> Jeffrey Amelse,<sup>a</sup> Auguste Fernandes,<sup>b</sup> Maria Filipa Ribeiro,<sup>b</sup> Carlos Geraldes,<sup>c,d</sup> João Rocha<sup>a</sup> and Luís Mafra<sup>\*,a</sup>

<sup>a</sup>. CICECO - Aveiro Institute of Materials, Department of Chemistry, University of Aveiro, Campus Universitário de Santiago, 3810-193 Aveiro, Portugal

<sup>b</sup>. Centro de Química Estrutural, Instituto Superior Técnico, Universidade de Lisboa, Av. Rovisco Pais, 1049-001 Lisboa, Portugal

<sup>c</sup>. Department of Life Sciences and Coimbra Chemistry Center, Faculty of Science and Technology, University of Coimbra, 3000-393 Coimbra, Portugal

<sup>d</sup>. CIBIT- Coimbra Institute for Biomedical Imaging and Translational Research, Edifício do ICNAS, 3000-548 Coimbra, Portugal

### **Experimental procedure**

#### **Sample preparation**

Two ZSM-5 materials with distinct acidic properties were prepared from the ammonium exchanged ZSM-5 (CBV3024E) obtained from Zeolyst International. HZSM-5 was prepared by calcining 2.5 g of the initial material under 5 L/h air flow, at 500 °C. In order to avoid the formation of large amounts of EFAL species, a two-step calcination procedure was used. The temperature was ramped from room temperature to 200 °C at 2 °C/min, kept at 200 °C for 1 hour, and then ramped to 500 °C at 2 °C/min, and held for 6h. Steam-HZSM-5 was prepared in similar conditions: the sample was exposed to a flow of water vapor (2.3 L/h) for 2 hours upon reaching 500 °C. Elemental analysis using ICP-OES resulted in a bulk Si/Al ratio around 13.5. Deconvolution of the  $^{29}\text{Si}$  MAS NMR spectra resulted in a framework Si/Al ratio around 16.12 and 17.83 for the parent ( $\text{NH}_4\text{ZSM-5}$ ) and calcined (HZSM-5) samples, respectively. Pure silica MFI material (silicalite-1) was prepared as follows: 1.50 g of tetrapropylammonium bromide (TPABr, 98 wt%, Aldrich) were dissolved in 14.70 mL of  $\text{H}_2\text{O}$ ; then 5.60 g of tetrapropylammonium hydroxide solution (1 M TPAOH in  $\text{H}_2\text{O}$ , Aldrich) was added to that solution. Finally, a mixture of 6.48 g of tetraethylorthosilicate (98 wt%, Aldrich) and 5.60 g of ethanol was added; the resulting precursor was agitated in an autoclave for 6 hours and then treated at 180 °C for 4 days without agitation. Finally, the solid product was collected by centrifugation, washed thoroughly with water, and dried at 80 °C. The removal of the organic template was carried out by calcining at 550 °C for 8 h following a ramp rate of 3 °C/min. Powder X-ray diffraction was used to ascertain the degree of crystallinity of the sample upon dealumination (97% referred to the calcinated sample). The medium pore AMS-1B borosilicate molecular sieve is disclosed in M.R. Klotz, U.S. Patent 4,269,813 (1981). The hydrogen form of AMS-1B, designated as HAMS-1B can be formed directly after calcination without the need for exchange, from gels substantially free of alkali metals following the disclosure of M.S. Haddad in U.S. Patent 5,053,211 (1991). The H-[B]-ZSM-5 sample used in this study was prepared by the method of Haddad.

TMPO was loaded using a solvent-free method, to avoid the solvent that usually remains when using the conventional method (solution of TMPO in chloroform). 50 mg of material were placed inside a 4 mm rotor that was then dehydrated overnight at 300 °C under high vacuum ( $10^{-5}$  mbar). To avoid the readsorption of water, the adsorption cell was filled with helium gas, the rotor closed inside the adsorption cell, and quickly transferred to a glove box ( $\text{H}_2\text{O} < 1$  ppm). 3.2 mg of TMPO were added to the dehydrated zeolite. The rotor was closed and then transferred to the same cell, and placed in an oven at 150 °C to adsorb the TMPO in the zeolite by sublimation.

#### **NMR measurements**

$^{31}\text{P}$  and  $^1\text{H}$  NMR spectra were acquired on a Bruker Avance III 400 spectrometer operating at a  $B_0$  field of 9.4 T with  $^{31}\text{P}$  and  $^1\text{H}$  Larmor frequencies of 161.9 and 400.1 MHz, respectively, using a 4 mm Bruker MAS probe. The samples were packed into 4 mm ZrO<sub>2</sub> rotors with Macor (with o-ring) caps.  $^{27}\text{Al}$  spectra were acquired on a Bruker Avance III 700 spectrometer operating at a  $B_0$  field of 16.4 T with  $^{27}\text{Al}$  Larmor frequency of 182.4 MHz, using a 1.9 mm Bruker MAS probe. The samples were packed into 1.9 mm ZrO<sub>2</sub> rotors with Vespel caps. Chemical shifts are quoted in ppm using the following secondary references: solid adamantane (1.85 ppm), an aqueous solution of  $\text{Al}(\text{NO}_3)_3$  (0 ppm) and solid  $\text{Na}_4\text{P}_2\text{O}_7$  (-2.09 ppm for the furthest upfield resonance) for  $^1\text{H}$ ,  $^{27}\text{Al}$  and  $^{31}\text{P}$ , respectively.  $^{31}\text{P}$  single-pulse excitation MAS NMR spectra were acquired at a spinning rate of 15 kHz using a 3.2  $\mu\text{s}$  pulse (90° flip angle) that corresponds to a radio-frequency (rf) field strength of 78 kHz. A recycle delay (RD) of 20 s was used.  $^{27}\text{Al}$  single-pulse MAS NMR spectra were acquired at a spinning rate of 40 kHz using a quantification pulse of 0.36  $\mu\text{s}$  (10° flip angle) corresponding to a rf field strength of 250 kHz.  $^1\text{H}$ - $^{31}\text{P}$  HETCOR NMR spectra were acquired using a  $^1\text{H}$  2.8  $\mu\text{s}$  pulse width (90° flip angle) corresponding to a rf of 90 kHz, the cross-polarization

step was performed using a contact time of 2000  $\mu\text{s}$  with a 70–100% RAMP shape on the  $^1\text{H}$  channel and a square shaped pulse of 51 kHz on the  $^{31}\text{P}$  channel, a RD of 2.25 s and a spinning rate of 15 kHz. A SPINAL-64 decoupling scheme was used with pulse length of 6  $\mu\text{s}$  at a rf field strength of 80 kHz. 145 t1 points with 2048 scans each were recorded along the indirect dimension.

## Computational methods

The 8T cluster models used to investigate the adsorption of TMPO onto Brønsted acid sites with distinct acid strength were constructed from the ZSM-5 crystalline structure. The Al atom was introduced in position T12 to mimic a Brønsted acid sites at the crossing of the straight and the sinusoidal channels of ZSM-5. The terminal Si-H moieties were fixed at the crystallographic positions to maintain the zeolites integrity while the central part ( $\text{O}_3\text{-Si-O(H)-Al-O}_3$ ) was allowed to relax. Si-H bond lengths changed from 1.30 to 2.75 Å to model a stronger Brønsted acid sites. NMR and geometry optimization calculations were performed using PBE1PBE/6-311g(2d,2p)//PBE1PBE/6-31+(g) (NMR//Geometry Optimization), that has been suggested as a good combination to accurately predict  $^{31}\text{P}$  chemical shifts at a reasonable cost.<sup>1</sup> All DFT calculation were preformed using Gaussian 09 Rev. E.01.<sup>2</sup> The calculated chemical shifts were referenced to TMPO (41 ppm) and TMS (0 ppm) for  $^{31}\text{P}$  and  $^1\text{H}$ , respectively.

**Table S1.** FTIR results of *in-situ* pyridine adsorption showing the conversion of Brønsted to Lewis acid sites as the samples are steamed at different temperatures.

| Sample                | % Brønsted | % Lewis |
|-----------------------|------------|---------|
| HZSM-5                | 90.44      | 9.56    |
| Steam HZSM-5 (500 °C) | 63.77      | 36.23   |
| Steam HZSM-5 (600 °C) | 62.59      | 37.41   |

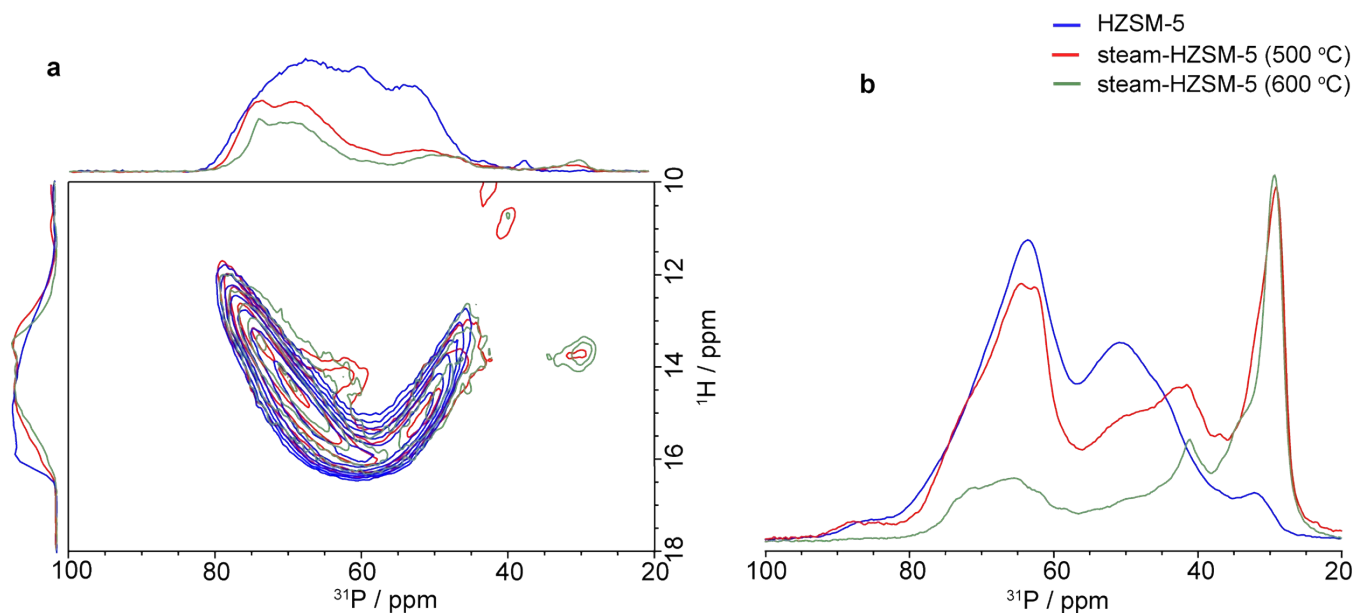

**Figure S1.** (a)  $^1\text{H}$ - $^{31}\text{P}$  HETCOR and (b)  $^{31}\text{P}$  MAS NMR spectra of HZSM-5, steam-HZSM-5 (500 °C) and steam-HZSM-5 (600 °C). The top projections of the  $^1\text{H}$ - $^{31}\text{P}$  HETCOR depict the  $^{31}\text{P}$  CPMAS spectra. The  $^{31}\text{P}$  absolute intensity spectra were acquired with the same experimental parameters.  $^{31}\text{P}$  MAS and  $^{31}\text{P}$  CPMAS spectra were recorded with 1536 and 2000 scans, respectively. After steaming (dealumination), the intensity of the  $^{31}\text{P}$  resonances assigned to TMPO molecules interacting with Brønsted acid sites decreases, especially for  $\delta_p < 60$  ppm. The strong resonance at  $\delta_p \sim 41$  ppm is given by excess crystalline TMPO.

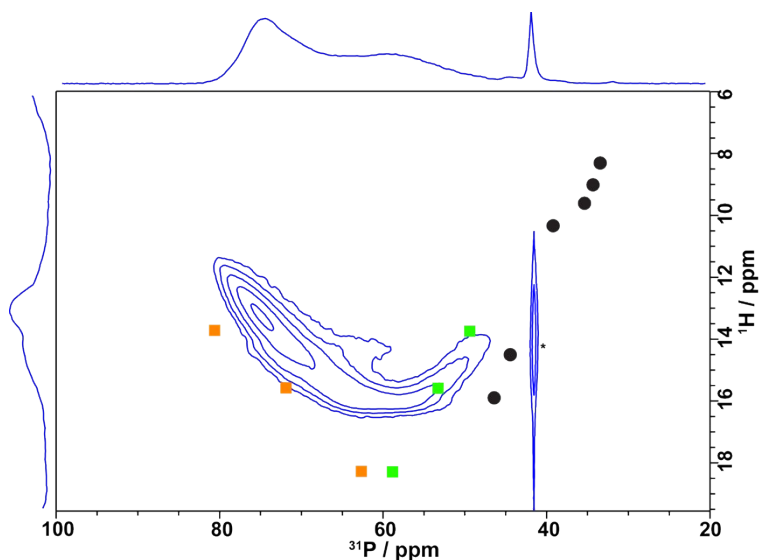

**Figure S2.**  $^1\text{H}$ - $^{31}\text{P}$  HETCOR NMR spectra of TMPO-loaded H[B]ZSM-5. ● (black) and orange and green ■ depict the calculated ( $\delta_{\text{H}}$ ,  $\delta_{\text{P}}$ ) pairs extracted from the ZH...TMPO, Z...TMPOH<sup>+</sup> and (d) (TMPO)<sub>2</sub>H<sup>+</sup>...Z<sup>-</sup> models, respectively. Further details on the models and calculated ( $\delta_{\text{H}}$ ,  $\delta_{\text{P}}$ ) pairs are depicted in Table S2. \* denotes crystalline TMPO.

**Table S2.** Results of the DFT calculation of one TMPO molecule adsorbed at ZSM-5 Brønsted acid site cluster models. Distances are quoted in Å where Si-H is the distance of the terminal Si-H bonds used to tune the model acid strength by changing the O<sub>Z</sub>-H distances (between the zeolite oxygen atom, O<sub>Z</sub>, and the acidic proton) and O<sub>P</sub>-H distances (between the acidic proton and the TMPO oxygen). Calculated  $\delta_{\text{H}}$  and  $\delta_{\text{P}}$  values are quoted in ppm and were obtained using the PBE1PBE/6-311g(2d,2p)//PBE1PBE/6-31+(g) combination.

| Si-H (Å) | 1 TMPO per acid site  |                       |                           |                           | 2 TMPO per acid site  |                        |                        |                            |                            |                           |
|----------|-----------------------|-----------------------|---------------------------|---------------------------|-----------------------|------------------------|------------------------|----------------------------|----------------------------|---------------------------|
|          | O <sub>Z</sub> -H (Å) | O <sub>P</sub> -H (Å) | $\delta_{\text{P}}$ (ppm) | $\delta_{\text{H}}$ (ppm) | O <sub>Z</sub> -H (Å) | O <sub>P1</sub> -H (Å) | O <sub>P2</sub> -H (Å) | $\delta_{\text{P1}}$ (ppm) | $\delta_{\text{P2}}$ (ppm) | $\delta_{\text{H}}$ (ppm) |
| 1.30     | 1.06                  | 1.42                  | 49.6                      | 14.8                      | 1.04                  | 3.10                   | 1.51                   | 27.6                       | 44.4                       | 13.3                      |
| 1.40     | 1.08                  | 1.37                  | 50.3                      | 16.0                      | 1.05                  | 2.91                   | 1.47                   | 28.7                       | 45.8                       | 14.2                      |
| 1.50     | 1.09                  | 1.35                  | 51.8                      | 16.5                      | 1.05                  | 2.90                   | 1.46                   | 29.0                       | 46.0                       | 14.4                      |
| 1.60     | 1.41                  | 1.07                  | 75.6                      | 15.5                      | 4.32                  | 1.39                   | 1.06                   | 51.3                       | 73.8                       | 15.2                      |
| 1.75     | 1.50                  | 1.03                  | 76.8                      | 13.3                      | 4.28                  | 1.39                   | 1.06                   | 51.8                       | 74.7                       | 15.2                      |
| 2.00     | 1.57                  | 1.02                  | 80.4                      | 12.0                      | 4.45                  | 1.39                   | 1.06                   | 51.9                       | 74.8                       | 15.0                      |
| 2.25     | 1.61                  | 1.01                  | 83.7                      | 10.9                      | 3.92                  | 1.44                   | 1.05                   | 47.3                       | 78.5                       | 14.3                      |
| 2.30     | 1.63                  | 1.01                  | 85.1                      | 10.6                      | 3.94                  | 1.43                   | 1.05                   | 47.4                       | 78.9                       | 14.4                      |
| 2.35     | 1.65                  | 1.00                  | 86.4                      | 10.3                      | 3.77                  | 1.43                   | 1.05                   | 47.6                       | 79.0                       | 14.5                      |

**Table S3.** Results of the DFT calculation of one TMPO molecule adsorbed at H-[B]-ZSM-5 Brønsted acid site cluster models. Distances are quoted in Å, where Si-H is the distance of the terminal Si-H bonds used to tune the model acid strength by changing the O<sub>Z</sub>-H distances (between the zeolite oxygen atom, O<sub>Z</sub> and the acidic proton) and O<sub>P</sub>-H distances (between the acidic proton and the TMPO oxygen). Calculated δ<sub>H</sub> and δ<sub>P</sub> values are quoted in ppm and were obtained using the PBE1PBE/6-311g(2d,2p)//PBE1PBE/6-31+(g) combination.

| 1 TMPO per acid site |                       |                       |                      |                      | 2 TMPO per acid site  |                        |                        |                       |                       |                      |
|----------------------|-----------------------|-----------------------|----------------------|----------------------|-----------------------|------------------------|------------------------|-----------------------|-----------------------|----------------------|
| Si-H (Å)             | O <sub>Z</sub> -H (Å) | O <sub>P</sub> -H (Å) | δ <sub>P</sub> (ppm) | δ <sub>H</sub> (ppm) | O <sub>Z</sub> -H (Å) | O <sub>P1</sub> -H (Å) | O <sub>P2</sub> -H (Å) | δ <sub>P1</sub> (ppm) | δ <sub>P2</sub> (ppm) | δ <sub>H</sub> (ppm) |
| 1.30                 | 0.99                  | 1.72                  | 33.01                | 8.38                 | 1.00                  | 6.03                   | 1.67                   | 29.29                 | 41.83                 | 9.19                 |
| 1.40                 | 0.99                  | 1.71                  | 33.78                | 8.61                 | 1.00                  | 5.97                   | 1.64                   | 31.49                 | 42.17                 | 9.56                 |
| 1.50                 | 1.00                  | 1.67                  | 34.19                | 8.99                 | 1.01                  | 5.58                   | 1.65                   | 31.47                 | 42.85                 | 9.86                 |
| 1.60                 | 1.00                  | 1.65                  | 35.19                | 9.55                 | 1.01                  | 5.06                   | 1.62                   | 31.98                 | 43.40                 | 10.23                |
| 1.75                 | 1.01                  | 1.61                  | 36.49                | 10.36                | 1.02                  | 5.06                   | 1.59                   | 31.73                 | 44.81                 | 11.01                |
| 2.00                 | 1.02                  | 1.55                  | 39.57                | 11.95                | 1.03                  | 4.86                   | 1.52                   | 31.54                 | 46.55                 | 12.70                |
| 2.25                 | 1.05                  | 1.45                  | 44.71                | 14.64                | 4.29                  | 1.20                   | 1.28                   | 59.82                 | 62.47                 | 18.20                |
| 2.30                 | 1.06                  | 1.43                  | 46.46                | 15.58                | 4.46                  | 1.36                   | 1.07                   | 53.33                 | 72.10                 | 16.10                |
| 2.35                 | 1.66                  | 1.01                  | 82.94                | 10.71                | 4.62                  | 1.45                   | 1.04                   | 49.20                 | 80.11                 | 13.67                |

**Table S4.** Textural properties of HZSM-5 samples.

| Sample code           | S <sub>BET</sub> (m <sup>2</sup> ·g <sup>-1</sup> ) | S <sub>EXT</sub> (m <sup>2</sup> ·g <sup>-1</sup> ) | V <sub>micro</sub> (cm <sup>3</sup> ·g <sup>-1</sup> ) | V <sub>meso</sub> (m <sup>2</sup> ·g <sup>-1</sup> ) |
|-----------------------|-----------------------------------------------------|-----------------------------------------------------|--------------------------------------------------------|------------------------------------------------------|
| HZSM-5                | 439                                                 | 101                                                 | 0.138                                                  | 0.104                                                |
| Steam HZSM-5 (500 °C) | 377                                                 | 112                                                 | 0.111                                                  | 0.106                                                |
| Steam HZSM-5 (600 °C) | 349                                                 | 144                                                 | 0.087                                                  | 0.125                                                |

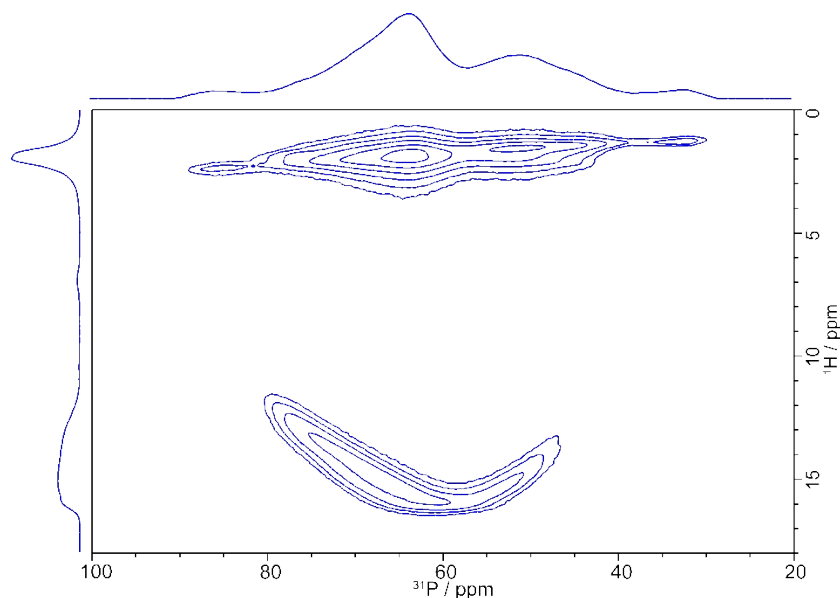

**Figure S3.** <sup>1</sup>H-<sup>31</sup>P HETCOR NMR spectrum of TMPO-loaded HZSM-5 zeolite with Si/Al ~ 27 (lower amount of Brønsted acid sites compared with the samples reported in the manuscript).

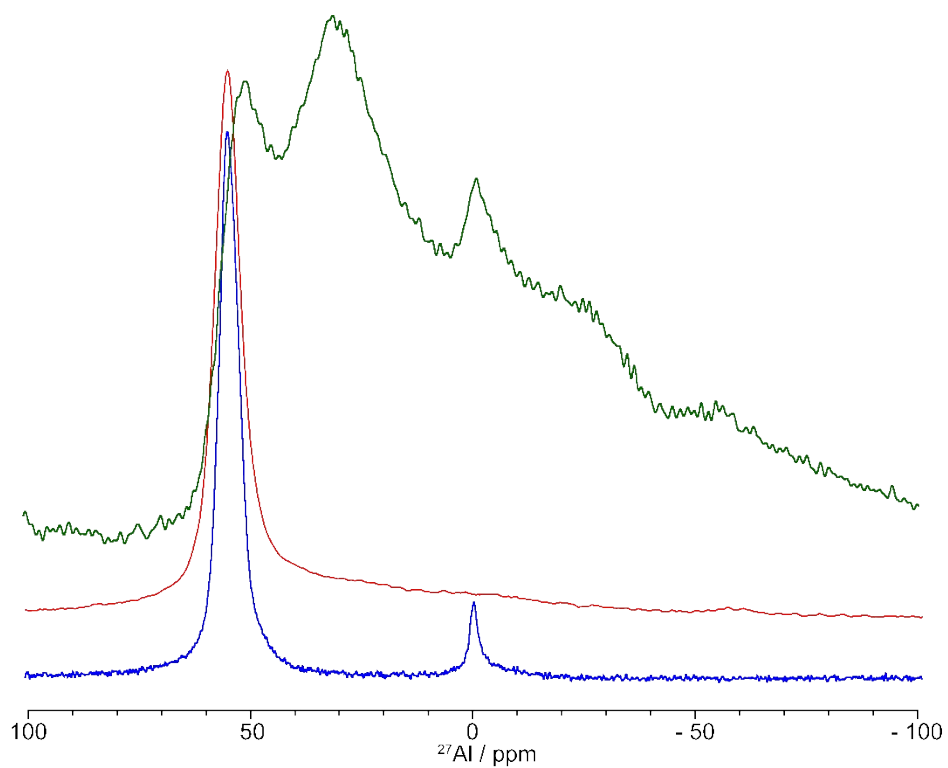

**Figure S4.**  $^{27}\text{Al}$  MAS NMR spectra of fully hydrated (blue), TMPO-loaded (red) and dehydrated (green) HZSM-5 sample.

#### REFERENCES

- 1 S. K. Latypov, F. M. Polyancev, D. G. Yakhvarov and O. G. Sinyashin, *Phys. Chem. Chem. Phys.*, 2015, **17**, 6976–6987.
- 2 D. J. Frisch, M. J.; Trucks, G. W.; Schlegel, H. B.; Scuseria, G. E.; Robb, M. A.; Cheeseman, J. R.; Scalmani, G.; Barone, V.; Mennucci, B.; Petersson, G. A.; Nakatsuji, H.; Caricato, M.; Li, X.; Hratchian, H. P.; Izmaylov, A. F.; Bloino, J.; Zheng, G.; Sonnenb, 2009.
